# Supplementary material for: Sonication of the anterior thalamus with MRI-Guided transcranial focused ultrasound (tFUS) alters pain thresholds in healthy adults: A double-blind, sham-controlled study
Source: PubMed Central journal article supplement — Brain Stimul. Author manuscript; Available in PMC 2021 Feb 17. (PMC7888561; doi:10.1016/j.brs.2020.10.007), 2020-10-24
Supplement: NIHMS1666632-supplement-Supplement_2.pdf [file NIHMS1666632-supplement-Supplement_2.pdf]

Supplemental Figure 1

**Main**

## Confirm Setup

Patient ID  Operator  Location/Site ID  MRI Info

Treatment ID  Notes

**NOTE: Select Modify Setup to change values below**

Transducer ID  XDCR Connection  Frequency (KHz)

|                                    |                                   |                                |                                 |
|------------------------------------|-----------------------------------|--------------------------------|---------------------------------|
| Pr.0 (MPa)                         | Ispta.0(mW/cm <sup>2</sup> )      | Pulse Width (ms)               | PRF (Hz)                        |
| <input type="text" value="0.636"/> | <input type="text" value="1017"/> | <input type="text" value="5"/> | <input type="text" value="10"/> |

|                                    |                                     |                                   |                                   |
|------------------------------------|-------------------------------------|-----------------------------------|-----------------------------------|
| Pr.3(MPa)                          | Ispta.3(mW/cm <sup>2</sup> )        | Duty Factor                       | XMT Volts                         |
| <input type="text" value="0.535"/> | <input type="text" value="719.73"/> | <input type="text" value="0.05"/> | <input type="text" value="14.2"/> |

|                                    |                                    |                                |
|------------------------------------|------------------------------------|--------------------------------|
| Pr.a (MPa)                         | Ispta.a(mW/cm <sup>2</sup> )       | Skull Thickness (mm)           |
| <input type="text" value="0.301"/> | <input type="text" value="227.7"/> | <input type="text" value="5"/> |

Sonication Duration (s)

Time between Sonications (s)

Number of Sonications

MRI Sync Enable

MRI Sync Delay(ms)

Sonication Indicator

Sonication File

**BC** Pulsar 1002 Tabletop  
Monday, October 12, 2020 01:47:31 PM  
Version 3.0.0
